# Supplementary material for: Self-powered piezoelectric microfluidic flow sensor for low-flow monitoring of metal-ion solutions
Source: Royal Society of Chemistry journal article supplement (doi:10.1039/d6ra02026g), 2026-04-16
Supplement: d6ra02026g1.pdf [file d6ra02026g1.pdf]

## **Self-Powered Piezoelectric Microfluidic Flow Sensor for Low-Flow Monitoring of Metal-Ion Solutions**

Yunzheng Zhang<sup>1,#</sup>, Tao Wang<sup>2,#</sup>, Jun Zheng<sup>1,#</sup>, Wenjin Luo<sup>3</sup>, Zhangjun Lan<sup>4</sup>, Binyou Xie<sup>1</sup>, Shushu Chen<sup>2</sup>, Xinming Xia<sup>3</sup>, Lihua Mu<sup>2</sup>, Jie Jiang<sup>2,\*</sup>, and Yan Fan<sup>1,\*</sup>, Liang Chen<sup>2</sup>

<sup>1</sup> *College of Optical, Mechanical and Electrical Engineering, Zhejiang A&F University, Hangzhou 311300, China.*

<sup>2</sup> *School of Physical Science and Technology, Ningbo University, Ningbo 315211, China.*

<sup>3</sup> *College of Physics Science and Technology, Yangzhou University, Jiangsu, 225009, China.*

#These authors contributed equally to this work.

\* Corresponding author. E-mail: fanyan503@zafu.edu.cn, and jiangjie1@nbu.edu.cn

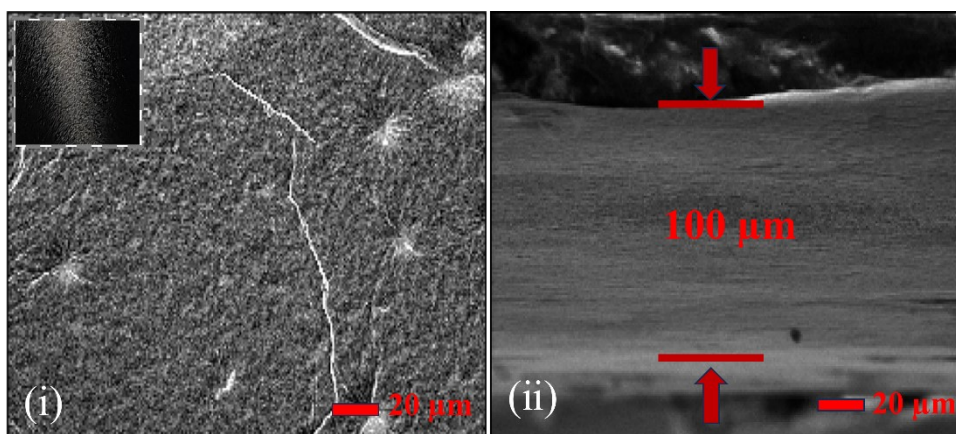

**Figure S1.** SEM images of the commercial piezoelectric film: (i) plan-view SEM image showing a relatively smooth and uniform surface; (ii) cross-sectional SEM image indicating a film thickness of approximately 100  $\mu\text{m}$ .

**Table S1.** Gravimetric calibration results of the syringe pump at set flow rates of 3, 10, 50, 100, and 200  $\mu\text{L}\cdot\text{min}^{-1}$ .

| Set flow rate<br>( $\mu\text{L}\cdot\text{min}^{-1}$ ) | Collection<br>time (min) | Measured flow rate<br>( $\mu\text{L}\cdot\text{min}^{-1}$ , mean $\pm$ SD, n<br>= 5) | Relative<br>error (%) | RSD<br>(%) |
|--------------------------------------------------------|--------------------------|--------------------------------------------------------------------------------------|-----------------------|------------|
| 3                                                      | 60                       | $3.009 \pm 0.021$                                                                    | 0.30                  | 0.69       |
| 10                                                     | 30                       | $10.032 \pm 0.031$                                                                   | 0.32                  | 0.31       |
| 50                                                     | 10                       | $50.050 \pm 0.274$                                                                   | 0.10                  | 0.55       |
| 100                                                    | 10                       | $100.088 \pm 0.534$                                                                  | 0.09                  | 0.53       |
| 200                                                    | 5                        | $200.124 \pm 0.192$                                                                  | 0.06                  | 0.19       |

Note: The actual flow rate was calculated from the collected liquid mass and collection time. Relative error was calculated with respect to the programmed flow rate.

**Table S2.** Comparison of Representative Microfluidic Flow Sensors

| Author                                              | Sensing Method                    | Sensitivity                                          | Limit of detection                      | Range                                         | External power    | Applicable fluid types                           |
|-----------------------------------------------------|-----------------------------------|------------------------------------------------------|-----------------------------------------|-----------------------------------------------|-------------------|--------------------------------------------------|
| Hongdan Wan et al. (2025) <sup>1</sup>              | Optical sensing                   | ~0.27 pm/( $\mu\text{L}\cdot\text{min}^{-1}$ )       | ~1.43 $\mu\text{L}\cdot\text{min}^{-1}$ | -                                             | Yes               | -                                                |
| Adam Hawke et al. (2023) <sup>2</sup>               | Pressure sensing                  | -                                                    | -                                       | 10–500 $\mu\text{L}\cdot\text{min}^{-1}$      | Yes               | DI water; water-glycerol solutions; blood        |
| Weinan Liu et al. (2025) <sup>3</sup>               | Optical sensing                   | 36.5 nm/( $\mu\text{L}\cdot\text{s}^{-1}$ )          | ~212nL $\cdot\text{s}^{-1}$             | 0–1.6 $\mu\text{L}\cdot\text{s}^{-1}$         | Yes               | Water                                            |
| R. Vilares et al. (2010) <sup>4</sup>               | Thermal flow sensing              | 485 $\mu\text{V}/(\mu\text{L}\cdot\text{min}^{-1})$  | 40nL $\cdot\text{min}^{-1}$             | 0–25 $\mu\text{L}\cdot\text{min}^{-1}$        | Yes               | DI water                                         |
| Zijun Zhang et al. (2024) <sup>5</sup>              | Pressure sensing                  | 4.33–6.67 Pa/(mL $\cdot\text{h}^{-1}$ )              | 2.9 $\mu\text{L}\cdot\text{h}^{-1}$     | 11.8–118.0mL $\cdot\text{min}^{-1}$           | Yes               | DI water                                         |
| John Collins and Abraham P. Lee (2004) <sup>6</sup> | Electrical admittance measurement | $5.2 \times 10^{-4}$ mA/(mL $\cdot\text{min}^{-1}$ ) | 0.05mL $\cdot\text{min}^{-1}$           | >0.05mL $\cdot\text{min}^{-1}$                | Yes               | NaOH; CaCl <sub>2</sub> ; KCl; KOH; D-PBS; D-MEM |
| Martin Seidl (2024) <sup>7</sup>                    | Mass flow sensing                 | -                                                    | 10 $\mu\text{L}\cdot\text{min}^{-1}$    | >20mL $\cdot\text{min}^{-1}$                  | Yes               | air                                              |
| Nadine Noeth et al. (2011) <sup>8</sup>             | Optical sensing                   | -                                                    | 3nL $\cdot\text{min}^{-1}$              | -                                             | Yes               | water                                            |
| Tiange Wu et al. (2020) <sup>9</sup>                | Optical sensing                   | $4.65 \times 10^5$ mV/(m $\cdot\text{s}^{-1}$ )      | 0.7 mm $\cdot\text{s}^{-1}$             | 0.6–14 kPa                                    | Yes               | Blood; DI water                                  |
| Wenxue Li et al. (2025) <sup>10</sup>               | Optical sensing                   | 22.51 nm/(mm $\cdot\text{s}^{-1}$ )                  | -                                       | 0.17–1.17mm $\cdot\text{s}^{-1}$              | Yes               | DI water                                         |
| Alex Baldwin et al. (2016) <sup>11</sup>            | Electrochemical sensing           | -                                                    | -                                       | –400 to 400 $\mu\text{L}\cdot\text{min}^{-1}$ | Yes               | physiological ionic fluids                       |
| Harsh Deswal et al. (2024) <sup>12</sup>            | Pressure sensing                  | 0.016 $\Omega/(\mu\text{L}\cdot\text{min}^{-1})$     | 5 $\mu\text{L}\cdot\text{min}^{-1}$     | 0–200 $\mu\text{L}\cdot\text{min}^{-1}$       | Yes               | NaCl (0.1–0.6 M)                                 |
| Trevor Q. Hudson et al. (2021) <sup>13</sup>        | Electrochemical sensing           | -                                                    | -                                       | 43–200 $\mu\text{L}\cdot\text{min}^{-1}$      | Yes               | physiological ionic fluids                       |
| This work                                           | Pressure sensing                  | 0.79 mV/( $\mu\text{L}\cdot\text{min}^{-1}$ )        | 3 $\mu\text{L}\cdot\text{min}^{-1}$     | 3–203 $\mu\text{L}\cdot\text{min}^{-1}$       | NO (self-powered) | DI water; electrolyte solutions                  |

**Section S3. Quantification of stability metrics**

To quantitatively evaluate the operational stability of the sensor, the steady-state output voltage for each condition was defined as the arithmetic mean of the selected plateau window<sup>14</sup>:

$$V_{ss} = \frac{1}{n} \sum_{i=1}^n V_i \quad (S1)$$

where  $V_i$  is the instantaneous voltage and  $n$  is the number of data points in the steady-

state window.

For electrolyte-dependent measurements, the normalized deviation of the steady-state output under the  $J$ -th condition relative to the reference condition<sup>14</sup> was calculated as

$$\delta(\%) = \frac{\bar{V}_{ss,j} - \bar{V}_{ss,ref}}{\bar{V}_{ss,ref}} \times 100\%, \quad (S2)$$

where  $\bar{V}_{ss,j}$  is the mean steady-state output voltage under the  $J$ -th electrolyte condition, and  $\bar{V}_{ss,ref}$  is the mean steady-state output voltage under the reference condition (1 mM NaCl at the same flow rate). The maximum electrolyte-dependent deviation reported in the main text corresponds to the largest value of  $\delta(\%)$  among all tested electrolyte conditions.

For the long-term continuous-flow test, the relative drift magnitude between the first and last 5 min steady-state windows<sup>14,16</sup> was calculated as

$$D(\%) = \left| \frac{\bar{V}_{end} - \bar{V}_{start}}{\bar{V}_{start}} \right| \times 100\% \quad (S3)$$

where  $\bar{V}_{start}$  and  $\bar{V}_{end}$  are the mean output voltages in the first and last 5 min steady-state windows, respectively, after excluding the startup and shutdown transients. the normalized temperature variation relative to the 20 °C condition<sup>15,16</sup> was calculated as

$$\eta_T(\%) = \left| \frac{\bar{V}_{ss,T} - \bar{V}_{ss,20^\circ C}}{\bar{V}_{ss,20^\circ C}} \right| \times 100\% \quad (S4)$$

where  $\bar{V}_{ss,T}$  is the mean steady-state output voltage at temperature  $T$ , and  $\bar{V}_{ss,20^\circ C}$  is the corresponding mean steady-state output voltage at the reference temperature of 20 °C. In this work, because the stability datasets correspond to continuous time traces under fixed conditions rather than multiple independent replicate runs, temporal SD/RSD and condition-to-condition deviations were used as quantitative descriptors of signal stability.

## References

1. H. Wan, S. Zhang, X. Chen, Y. Cui, S. Li, Y. Xiao and C. Wan, *Optics & Laser Technology*, 2025, **184**, 112520.
2. A. Hawke, G. Concilia, P. Thurgood, A. Ahnood, S. Baratchi and K. Khoshmanesh, *Sensors and Actuators A: Physical*, 2023, **362**, 114686.
3. W. Liu, S. Pu, C. Zhang, S. Huang, T. Xu and Q. Wu, *Sensors and Actuators A: Physical*, 2025, **393**, 116844.

4. R. Vilares, C. Hunter, I. Ugarte, I. Aranburu, J. Berganzo, J. Elizalde and L. J. Fernandez, *Sensors and Actuators B: Chemical*, 2010, **147**, 411-417.
5. Z. Zhang, T. Hou, Y. Ren, C. Wang, Z. Wang, H. Pan, P. Li, R. Smith and J. Wang, *Flow Measurement and Instrumentation*, 2024, **96**, 102551.
6. J. Collins and A. P. Lee, *Lab Chip*, 2004, **4**, 7-10.
7. M. Seidl and G. Schrag, *Micromachines*, 2024, **15**, 1404.
8. N. Noeth, S. S. Keller and A. Boisen, *Journal of Micromechanics and Microengineering*, 2011, **21**, 015007.
9. T. Wu, J. Shen, Z. Li, T. Zou, W. Xin, F. Xing, F. Zhang, Z. Man and S. Fu, *Opt Express*, 2020, **28**, 16594-16604.
10. W. Li, J. Li, J. Ye, W. Xu, Y. Liu and S. Qu, *Opt Express*, 2025, **33**, 12509-12518.
11. A. Baldwin, L. Yu and E. Meng, *Journal of Microelectromechanical Systems*, 2016, **25**, 1015-1024.
12. H. Deswal, U. Pandey, S. G. Singh and A. Agrawal, *International Journal of Thermofluids*, 2024, **23**, 100760.
13. T. Q. Hudson and E. Meng, *Journal of Microelectromechanical Systems*, 2021, **30**, 456-470.
14. N. Heckert, J. Filliben, C. Croarkin, B. Hembree, W. Guthrie, P. Tobias and J. Prinz, *Journal*, 2002.
15. L. Liu, Y. Dou, J. Wang, Y. Zhao, W. Kong, C. Ma, D. He, H. Wang, H. Zhang, A. Chang and P. Zhao, *Advanced Science*, 2024, **11**, 2405003.
16. J. Li, Z. Fang, D. Wei and Y. Liu, *Advanced Healthcare Materials*, 2024, **13**, 2401532.
